# Supplementary material for: Ionic liquids as a shuttle for releasing and capturing hydrogen chloride: a new way to utilize waste HCl generated in organic reactions
Source: Royal Society of Chemistry journal article supplement (doi:10.1039/d4gc00580e), 2024-01-01

## Supporting Information

Ionic liquids as a shuttle of releasing and capturing hydrogen chloride: a new way to utilize waste HCl generated in organic reactions

Fanzeng Kong<sup>a</sup>, Minghao Li<sup>a</sup>, Rongxian Bai<sup>a\*</sup>, and Yanlong Gu<sup>a\*</sup>

<sup>a</sup>Key Laboratory of Material Chemistry for Energy Conversion and Storage, Ministry of Education, School of Chemistry and Chemical Engineering, Hubei. Key Laboratory of Material Chemistry and Service Failure, Huazhong University of Science and Technology, Wuhan, 430074, China.

\*Corresponding authors, E-mail addresses: bairx@126.com (R. Bai); klgyl@hust.edu.cn (Y. Gu)

### Table of Contents

| Contents                   | Page |
|----------------------------|------|
| 1. Experimental procedures | S2   |
| 2. Figure S1-S7            | S4   |
| 3. Table S1-S4             | S10  |
| 4. Characterization data   | S14  |

## 1 Experimental

**Chemicals and Equipment.** Ethanol absolute (99.7%) and *o*-phenylenediamine (98.5%) were purchased from Sinopharm Chemical Reagents Co., Ltd. Ethyl 2-chloroacetoacetate (98%) and 1-methyl-1H-imidazole (98%) were purchased from Shanghai bidepharmatech Co., Ltd. Benzoyl chloride (99%), glycidyl phenyl ether (99%), 2-chloroacetophenone (99%), epichlorohydrin (99%), L-Carnitine (98%), betaine (96%) and 2-aminopyridine (99%) were manufactured by energy-chemical Factory. All reagents were raw and directly used to experiment. The pH meter with a resolution ratio of 0.01 pH was purchased from Leici Laboratory (China).

### 1.1 Preparation of ionic liquid.

**1-Carboxymethyl-3-methylimidazolium chloride:** the target ionic liquid was prepared according to the literature's method.<sup>1</sup> In a typical procedure, 1-methylimidazole (5 mmol) was added to a solution of chloroacetic acid (5 mmol) in anhydrous chloroform (8 mL) at room temperature. The resulting mixture was refluxed at 70 °C for 50 h under a nitrogen atmosphere. The produced solid was filtrated and washed with anhydrous ethanol at least three times. The final product was obtained by drying in vacuo at 60°C for 24 h.

**3-(triethylammonio) propane sulfonate:** 3-(triethylammonio) propane sulfonate was synthesized based on the literature's method.<sup>2</sup> In a typical procedure, Triethylamine (5 mmol) and 1,3-propanesultone (5 mmol) were dissolved in ethanol (10 mL) and heated with stirring at 70°C for 12 h. The obtained white precipitate, 3-(triethylammonio) propane sulfonate, was filtered, washed with diethyl ether to remove unreacted reactants. The white solid was obtained by drying in vacuo at 80°C for 12 h.

### 1.2 Recycle of HCl.

**Recycle of the reaction of *o*-phenylenediamine with 2-chloroacetophenone and ring-opening of phenyl glycidyl ether:** To a V-type flask containing the 1-[1-(ethoxycarbonyl)-2-oxopropyl]-3-methylimidazolium inner salt (0.75 mmol) solution in toluene (1 mL) was added *o*-phenylenediamine (1.0 mmol), 2-chloroacetophenone (0.5 mmol). The tube reactor equipped with triangular magnetic stirrer was heated at 40°C and monitored by TLC. After the completion of the reaction, reaction mixture was allowed to cool to room temperature and was extracted by n-hexane, which subjected to an isolation with preparative TLC (20 cm × 20 cm) by using eluting solution (PE/EA = 7/3(v/v)). The remaining ionic liquid was washed with toluene (5 mL × 3). Then 0.75 mmol of phenyl glycidyl ether was added into the above tube, which was then heated at 40 °C for 12 hours. After the completion of the reaction, reaction mixture was allowed to cool to room temperature again. The reaction solution was isolated by extraction to calculate the yield of product, and the remaining ionic liquid was used for the next run.

**Recycle of the reaction of 2-aminopyridine with 2-chloroacetophenone and ring-opening of phenyl glycidyl ether:** To a V-type flask containing 1-[1-(ethoxycarbonyl)-2-oxopropyl]-3-methylimidazolium inner salt (0.5 mmol) solution in anisole (1 mL) was added 2-aminopyridine

(1.0 mmol), 2-chloroacetophenone (0.5 mmol). The tube reactor equipped with triangular magnetic stirrer was heated at 60°C and monitored by TLC. After the completion of the reaction, reaction mixture was allowed to cool to room temperature and extracted by n-hexane, which subjected to an isolation with preparative TLC (20 cm × 20 cm) by using eluting solution (PE/EA = 7/3(v/v)). The remaining ionic liquid was washed with toluene (5 ml × 3). Then 0.5 mmol of phenyl glycidyl ether was added into the above tube, which was heated at 40 °C for 12 hours. After the completion of the reaction, reaction mixture was allowed to cool to room temperature again. The reaction solution was isolated by extraction for calculating the yield of product, and the remaining ionic liquid was used for the next run.

### 1.3 Characterization

FT-IR spectra were obtained on Bruker Compass VERTEX 70. The UV spectra were obtained with the Shimadzu UV-Vis Spectrophotometer UV-2600i. The reactions were monitored by TLC with Haiyang GF-254 silica gel plates (Qingdao Haiyang chemical industry Co. Ltd, Qingdao, China) using UV light or KMnO<sub>4</sub> as visualizing agents as needed. Flash column chromatography was performed using 200-300 mesh silica gel at increased pressure. <sup>1</sup>H NMR spectra and <sup>13</sup>C NMR spectra were respectively recorded on Brüker AV-400 spectrometers. Chemical shifts (δ) were expressed in ppm relative to Me<sub>4</sub>Si in CDCl<sub>3</sub>, and coupling constants (J) were reported in Hz. High-resolution mass spectra (HRMS) were obtained on Brüker Compass Data Analysis 4.0. TGA was recorded on Pyris1 TGA under N<sub>2</sub> environment.

### References

- 1 D.Liu, J.Gui, X.Zhu, L.Song and Z.Sun, *Synthetic.Commun.*, 2007,**37**,759–765.
- 2 Z.Y.Yu, M.Y.Chen, J.X.He, D.J.Tao, J.J.Yuan, Y.Y.Peng and Z.B.Song, *Mol.Catal.*, 2017, **434**,134–139.

## 2. Figure S1-S6

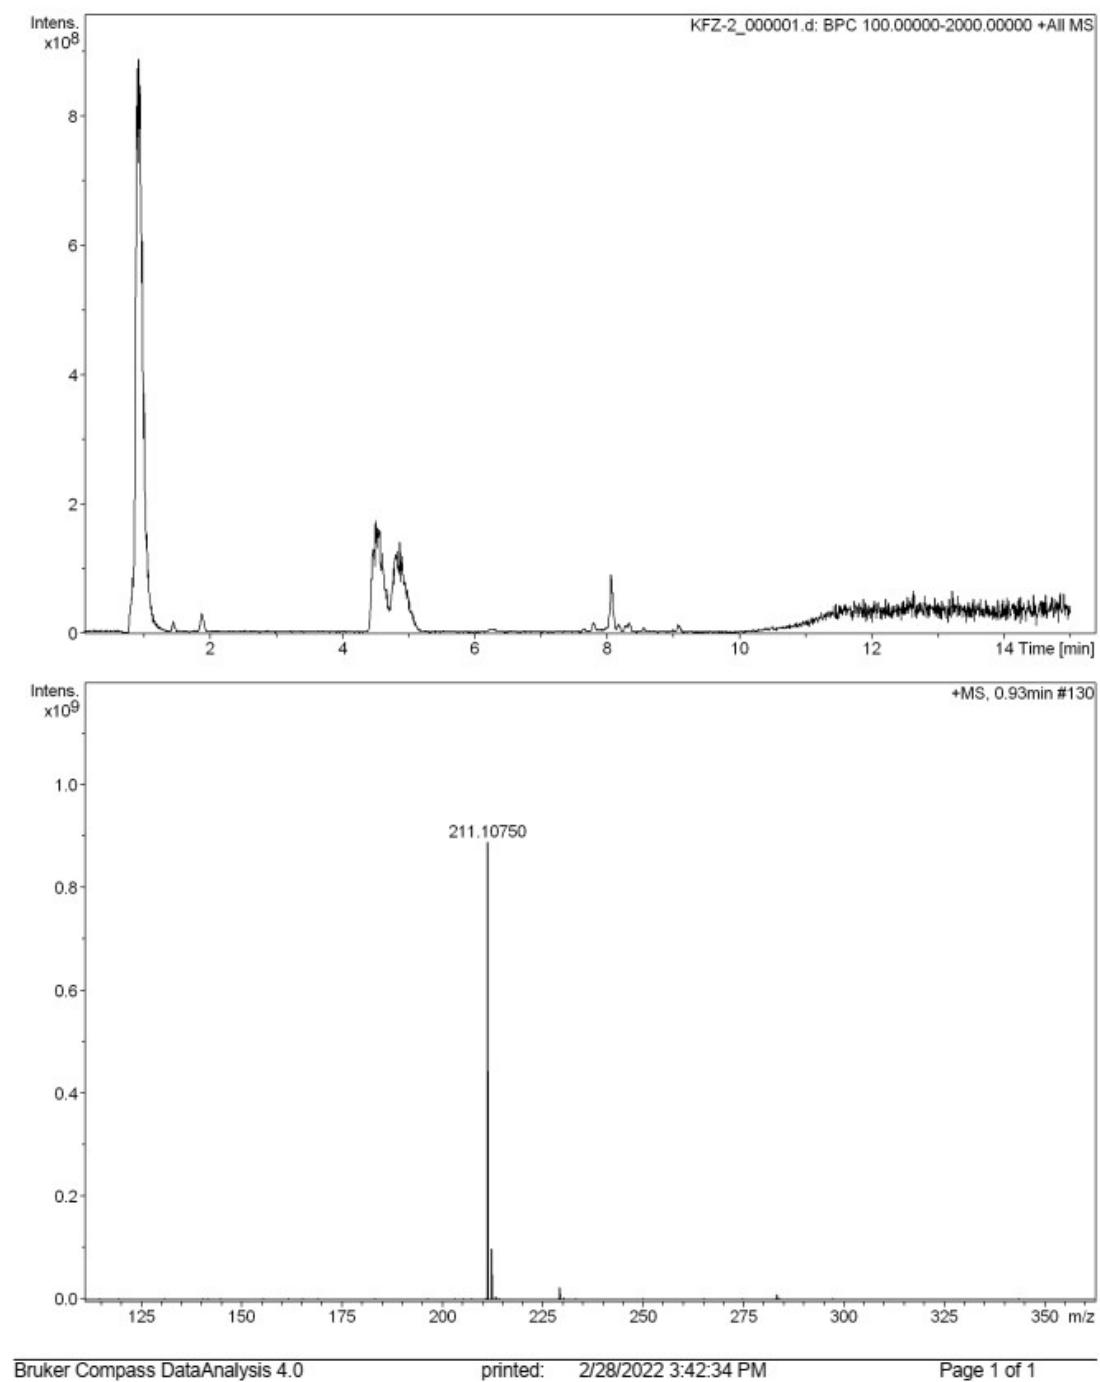

**Fig.S1** LC-MS profile of 1,3-(CO)<sub>2</sub>IL-HCl

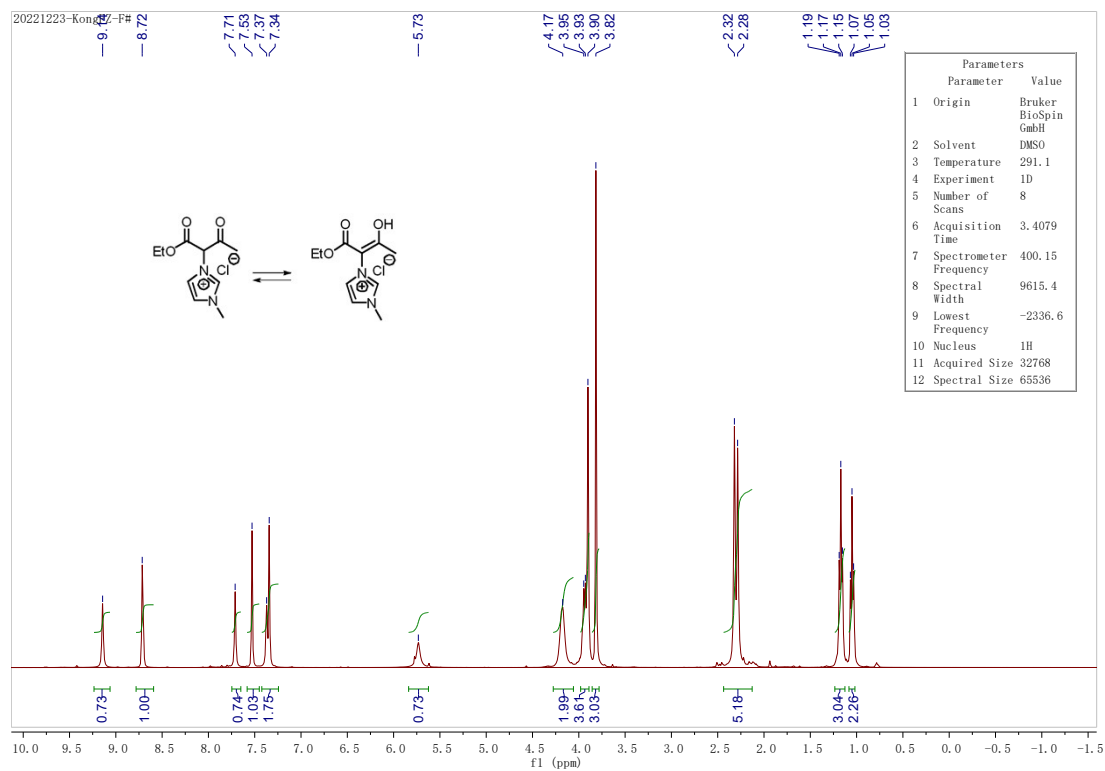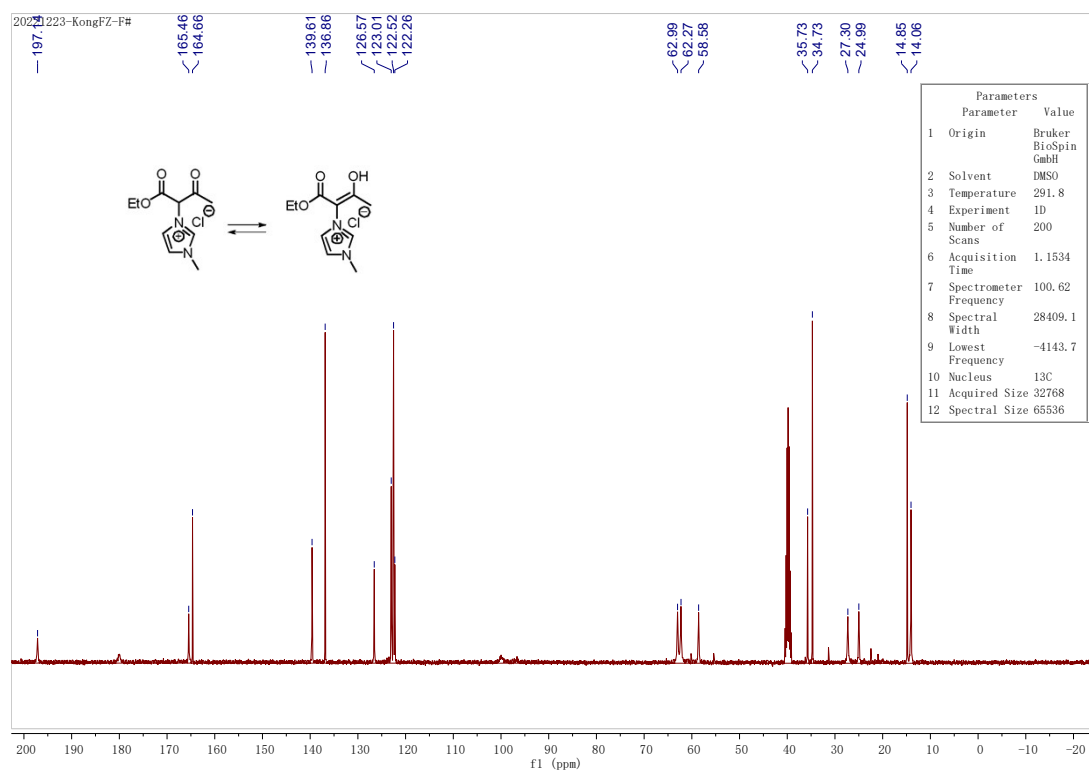

Fig. S2 NMR spectra of 1,3-(CO)<sub>2</sub>IL-HCl

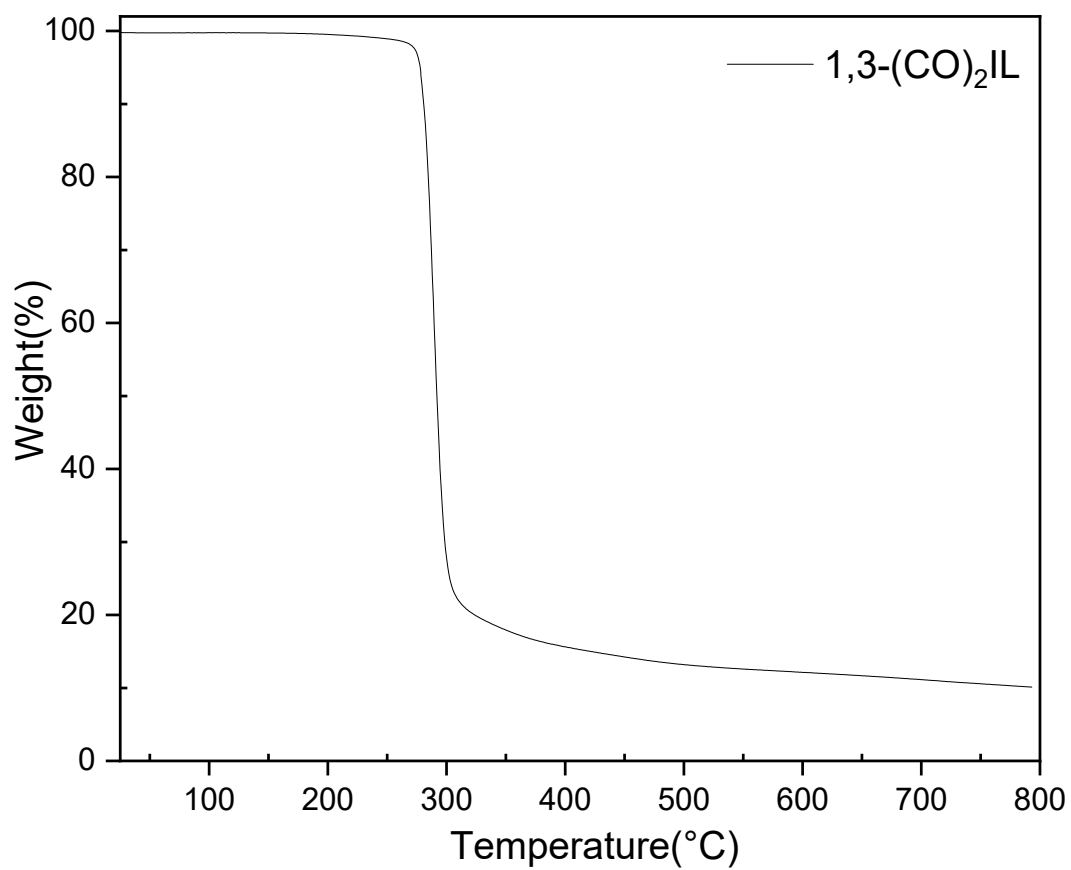

**Fig. S3** TG curve of 1,3-(CO)<sub>2</sub>IL

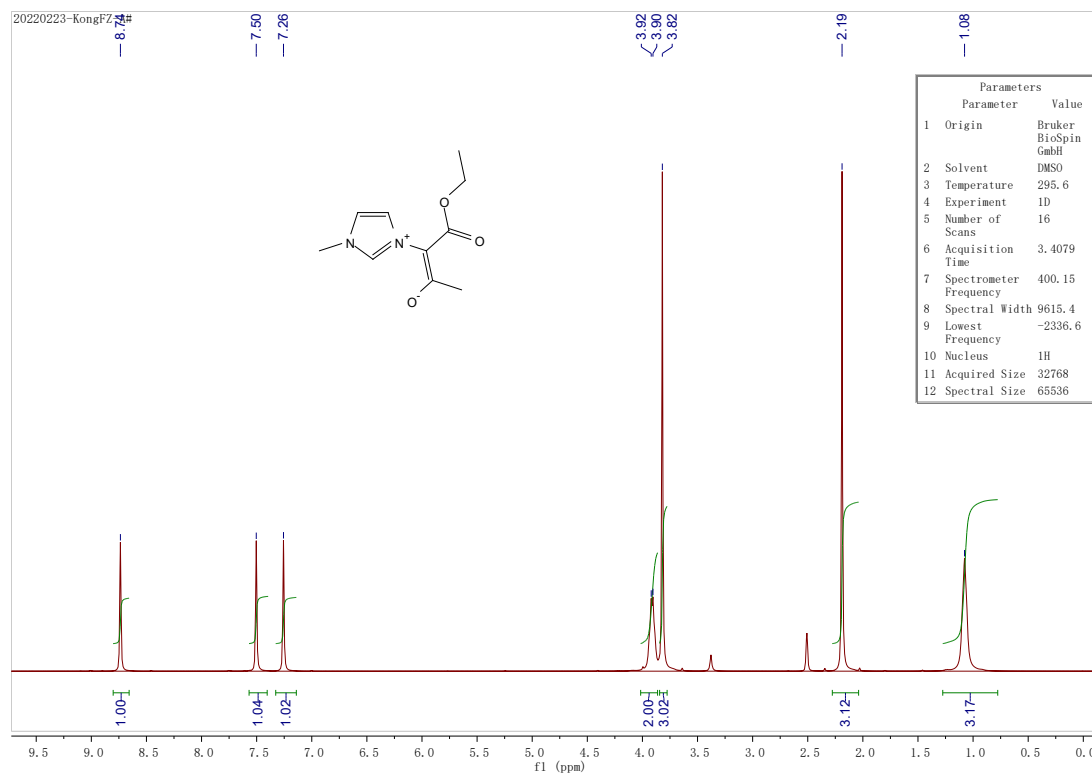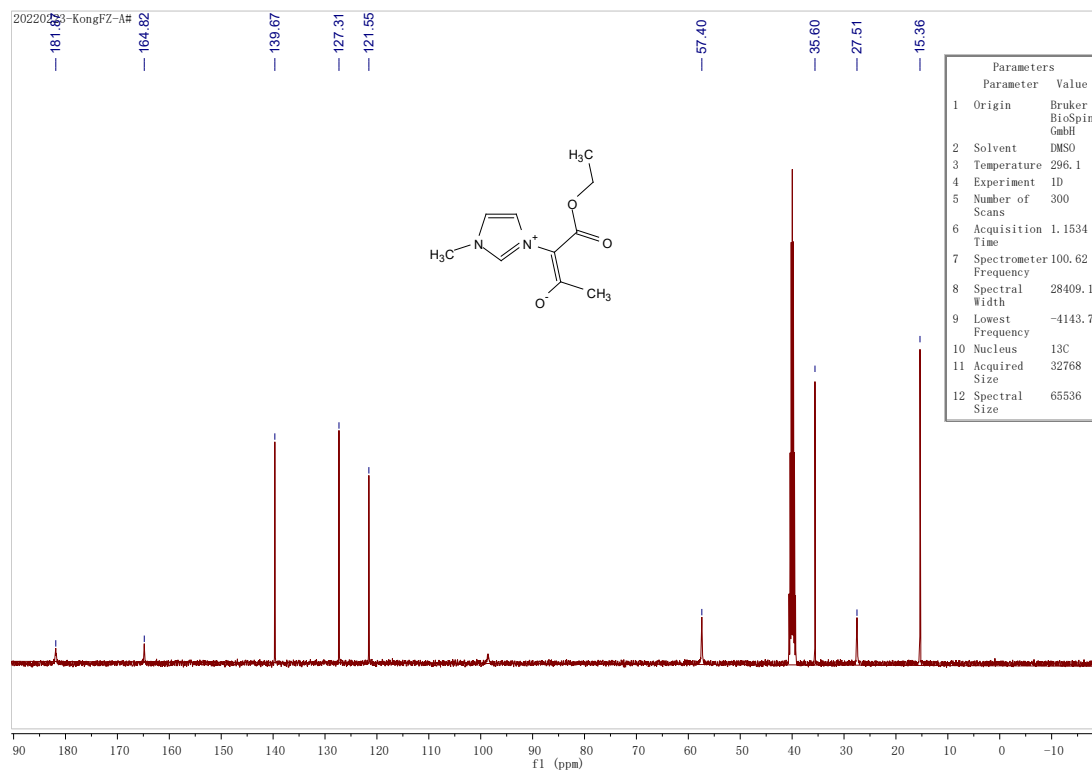

Fig. S4 NMR spectra of 1,3-(CO)<sub>2</sub>IL

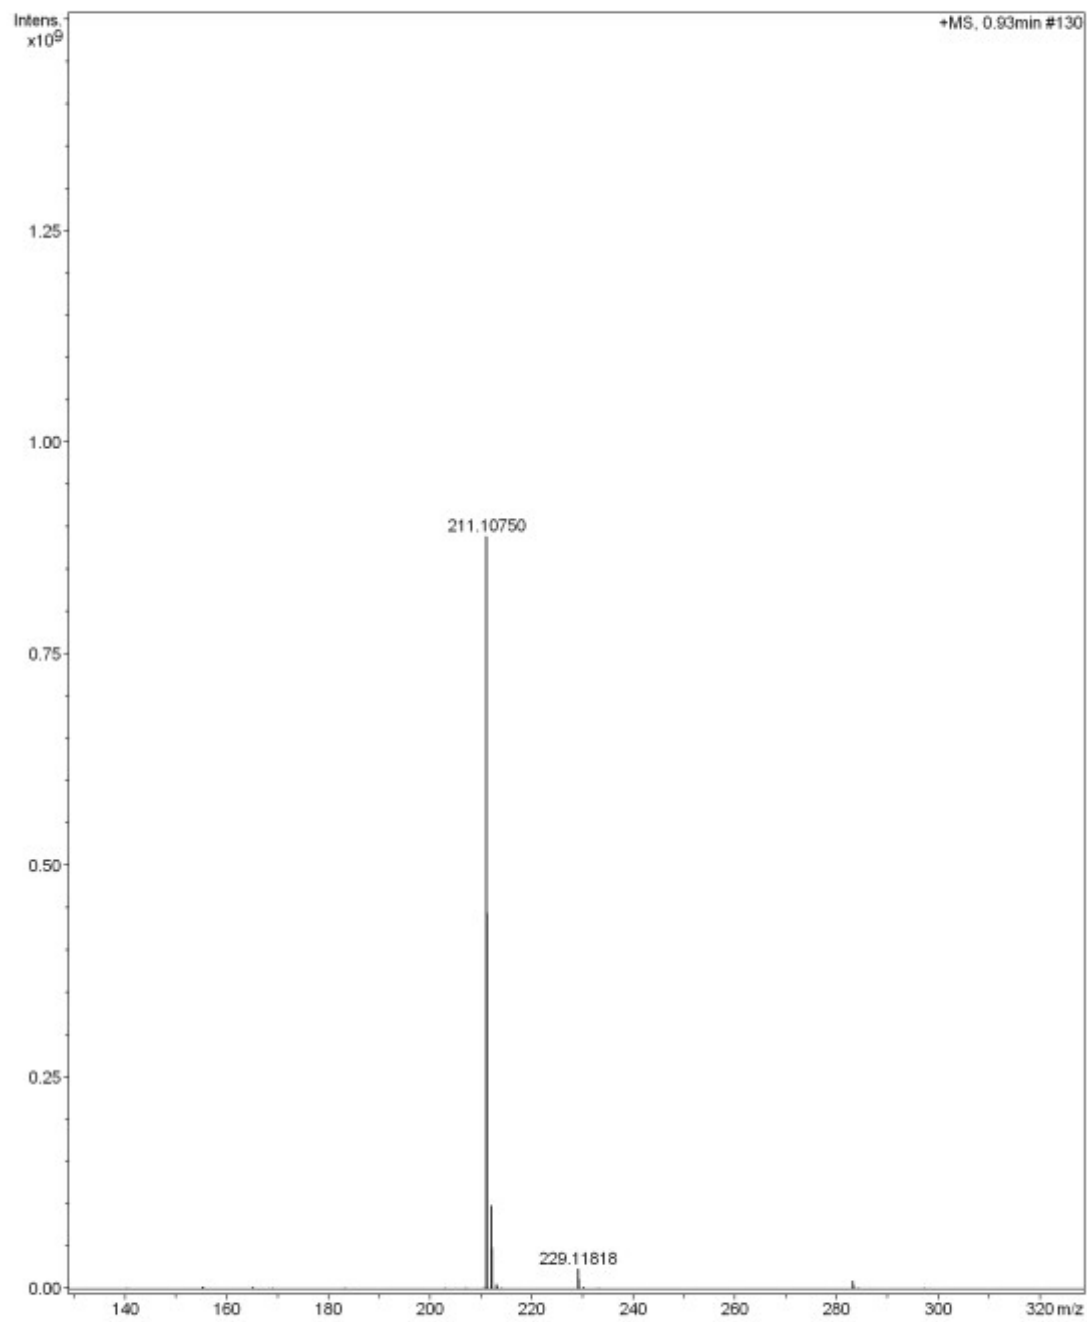

**Fig. S5** HRMS profile of 1,3-(CO)<sub>2</sub>IL



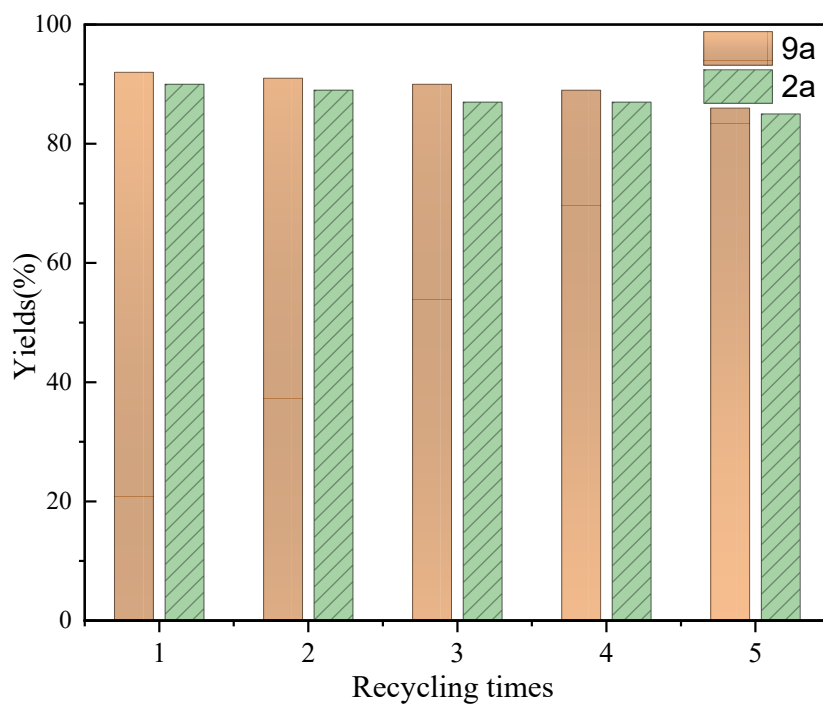

**Fig. S6** Recycle of HCl based on the reaction of *o*-phenylenediamine and 2-chloroacetophenone and ring-opening of phenyl glycidyl ether.

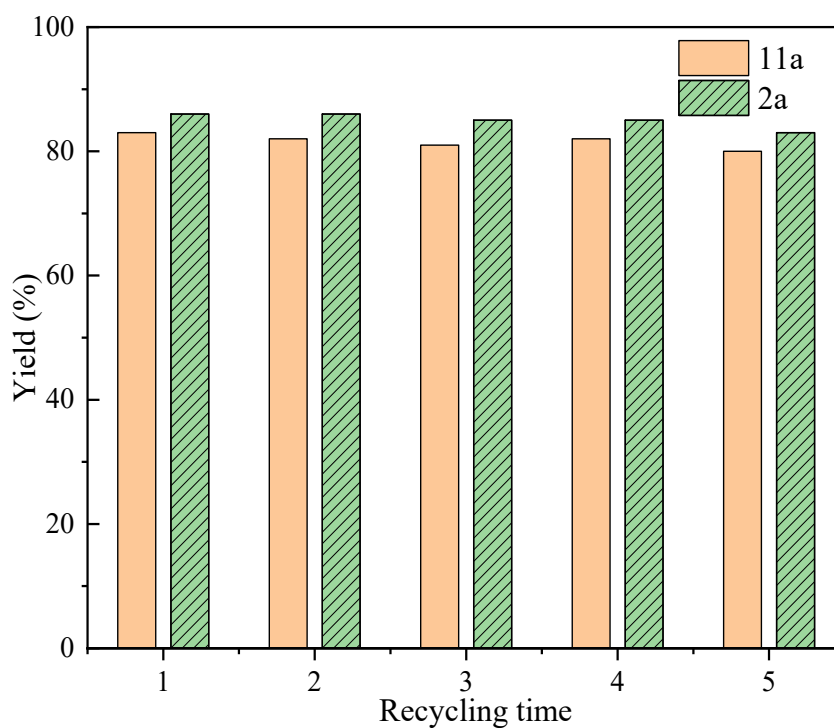

**Fig. S7** Recycle of HCl based on the reaction of 2-aminopyridine and 2-chloroacetophenone and ring-opening of phenyl glycidyl ether.

### 3. Table S1-S4

**Table S1.**  $pK_a$  at different UV wavelengths in H<sub>2</sub>O

| H <sub>2</sub> O  |                                                 |                         |                                                                            |                                               |                                                  |         |         |
|-------------------|-------------------------------------------------|-------------------------|----------------------------------------------------------------------------|-----------------------------------------------|--------------------------------------------------|---------|---------|
| Wavelength<br>/nm | H <sub>2</sub> SO <sub>4</sub> /A <sub>HL</sub> | NaOH/A <sub>L</sub> - A | (A- A <sub>L</sub> <sup>-</sup> )<br>(B- / <sub>(A<sub>HL</sub>-A)</sub> ) | (A-A <sub>L</sub> -)/<br>(A <sub>HL</sub> -A) | Lg (A-A <sub>L</sub> -)/<br>(A <sub>HL</sub> -A) | $pK_a$  |         |
| pH                | 1.02                                            | 12.83                   | 4.70                                                                       |                                               |                                                  |         |         |
| 251               | 0.232                                           | 0.856                   | 0.518                                                                      | 1.18182                                       | 1.18182                                          | 0.07255 | 4.77255 |
| 252               | 0.224                                           | 0.906                   | 0.543                                                                      | 1.13793                                       | 1.13793                                          | 0.05612 | 4.75612 |
| 253               | 0.215                                           | 0.959                   | 0.567                                                                      | 1.11364                                       | 1.11364                                          | 0.04674 | 4.74674 |
| 254               | 0.205                                           | 1.010                   | 0.590                                                                      | 1.09091                                       | 1.09091                                          | 0.03779 | 4.73779 |
| 255               | 0.195                                           | 1.057                   | 0.611                                                                      | 1.07212                                       | 1.07212                                          | 0.03024 | 4.73024 |
| 256               | 0.185                                           | 1.104                   | 0.632                                                                      | 1.05593                                       | 1.05593                                          | 0.02363 | 4.72363 |
| 257               | 0.173                                           | 1.147                   | 0.650                                                                      | 1.04193                                       | 1.04193                                          | 0.01784 | 4.71784 |
| 258               | 0.163                                           | 1.184                   | 0.666                                                                      | 1.02982                                       | 1.02982                                          | 0.01276 | 4.71276 |
| 259               | 0.152                                           | 1.217                   | 0.679                                                                      | 1.02087                                       | 1.02087                                          | 0.00897 | 4.70897 |
| 260               | 0.141                                           | 1.245                   | 0.689                                                                      | 1.01460                                       | 1.01460                                          | 0.00629 | 4.70629 |
| 261               | 0.130                                           | 1.268                   | 0.696                                                                      | 1.01060                                       | 1.01060                                          | 0.00458 | 4.70458 |
| 262               | 0.119                                           | 1.284                   | 0.700                                                                      | 1.00516                                       | 1.00516                                          | 0.00224 | 4.70224 |
| 263               | 0.109                                           | 1.293                   | 0.700                                                                      | 1.00338                                       | 1.00338                                          | 0.00147 | 4.70147 |
| 264               | 0.099                                           | 1.296                   | 0.696                                                                      | 1.00503                                       | 1.00503                                          | 0.00218 | 4.70218 |
| 265               | 0.091                                           | 1.290                   | 0.689                                                                      | 1.00502                                       | 1.00502                                          | 0.00217 | 4.70217 |
| 266               | 0.082                                           | 1.277                   | 0.677                                                                      | 1.00840                                       | 1.00840                                          | 0.00363 | 4.70363 |
| 267               | 0.074                                           | 1.257                   | 0.661                                                                      | 1.01533                                       | 1.01533                                          | 0.00661 | 4.70661 |
| 268               | 0.067                                           | 1.230                   | 0.643                                                                      | 1.01910                                       | 1.01910                                          | 0.00822 | 4.70822 |
| 269               | 0.061                                           | 1.195                   | 0.620                                                                      | 1.02862                                       | 1.02862                                          | 0.01226 | 4.71226 |
| 270               | 0.055                                           | 1.154                   | 0.595                                                                      | 1.03519                                       | 1.03519                                          | 0.01502 | 4.71502 |
| 271               | 0.050                                           | 1.107                   | 0.566                                                                      | 1.04845                                       | 1.04845                                          | 0.02055 | 4.72055 |
| 272               | 0.046                                           | 1.056                   | 0.535                                                                      | 1.06544                                       | 1.06544                                          | 0.02753 | 4.72753 |
| 273               | 0.043                                           | 1.000                   | 0.503                                                                      | 1.08043                                       | 1.08043                                          | 0.03360 | 4.73360 |
| 274               | 0.040                                           | 0.941                   | 0.467                                                                      | 1.11007                                       | 1.11007                                          | 0.04535 | 4.74535 |
| 275               | 0.037                                           | 0.878                   | 0.431                                                                      | 1.13452                                       | 1.13452                                          | 0.05481 | 4.75481 |
| 276               | 0.035                                           | 0.813                   | 0.394                                                                      | 1.16713                                       | 1.16713                                          | 0.06712 | 4.76712 |
| 277               | 0.033                                           | 0.750                   | 0.359                                                                      | 1.19939                                       | 1.19939                                          | 0.07896 | 4.77896 |
| 278               | 0.032                                           | 0.685                   | 0.323                                                                      | 1.24399                                       | 1.24399                                          | 0.09482 | 4.79482 |
| 279               | 0.030                                           | 0.625                   | 0.289                                                                      | 1.29730                                       | 1.29730                                          | 0.11304 | 4.81304 |
| 280               | 0.029                                           | 0.568                   | 0.257                                                                      | 1.36404                                       | 1.36404                                          | 0.13483 | 4.83483 |

$$pK_a = 4.73$$

**Table S2.**  $pK_a$  at different UV wavelengths in DMSO

| DMSO              |                                                     |                  |                    |                                                    |                                               |                                                  |         |
|-------------------|-----------------------------------------------------|------------------|--------------------|----------------------------------------------------|-----------------------------------------------|--------------------------------------------------|---------|
| Wavelength<br>/nm | H <sub>2</sub> SO <sub>4</sub> /<br>A <sub>HL</sub> | A <sub>L</sub> - | H <sub>2</sub> O/A | (A- A <sub>L</sub> -)/<br>(B- (A <sub>HL</sub> -A) | (A-A <sub>L</sub> -)/<br>(A <sub>HL</sub> -A) | Lg (A-A <sub>L</sub> -)/<br>(A <sub>HL</sub> -A) | $pK_a$  |
| pH                | 1.80                                                | 9.08             | 6.51               |                                                    |                                               |                                                  |         |
| 260               | 0.408                                               | 1.602            | 0.675              | 3.47191                                            | 3.47191                                       | 0.54057                                          | 7.05057 |
| 261               | 0.366                                               | 1.730            | 0.663              | 3.59259                                            | 3.59259                                       | 0.55541                                          | 7.06541 |
| 262               | 0.344                                               | 1.809            | 0.660              | 3.63608                                            | 3.63608                                       | 0.56063                                          | 7.07063 |
| 263               | 0.320                                               | 1.837            | 0.643              | 3.69659                                            | 3.69659                                       | 0.56780                                          | 7.07780 |
| 264               | 0.288                                               | 1.882            | 0.636              | 3.58046                                            | 3.58046                                       | 0.55394                                          | 7.06394 |
| 265               | 0.262                                               | 1.872            | 0.604              | 3.70760                                            | 3.70760                                       | 0.56909                                          | 7.07909 |
| 266               | 0.240                                               | 1.862            | 0.585              | 3.70145                                            | 3.70145                                       | 0.56837                                          | 7.07837 |
| 267               | 0.218                                               | 1.828            | 0.563              | 3.66667                                            | 3.66667                                       | 0.56427                                          | 7.07427 |
| 268               | 0.196                                               | 1.752            | 0.537              | 3.56305                                            | 3.56305                                       | 0.55182                                          | 7.06182 |
| 269               | 0.177                                               | 1.696            | 0.506              | 3.61702                                            | 3.61702                                       | 0.55835                                          | 7.06835 |
| 270               | 0.160                                               | 1.629            | 0.476              | 3.64873                                            | 3.64873                                       | 0.56214                                          | 7.07214 |
| 271               | 0.150                                               | 1.556            | 0.450              | 3.68667                                            | 3.68667                                       | 0.56663                                          | 7.07663 |
| 272               | 0.129                                               | 1.464            | 0.416              | 3.65157                                            | 3.65157                                       | 0.56248                                          | 7.07248 |
| 273               | 0.118                                               | 1.370            | 0.388              | 3.63704                                            | 3.63704                                       | 0.56075                                          | 7.07075 |
| 274               | 0.108                                               | 1.276            | 0.359              | 3.65339                                            | 3.65339                                       | 0.56270                                          | 7.07270 |
| 275               | 0.100                                               | 1.178            | 0.329              | 3.70742                                            | 3.70742                                       | 0.56907                                          | 7.07907 |
| 276               | 0.088                                               | 1.076            | 0.300              | 3.66038                                            | 3.66038                                       | 0.56353                                          | 7.07353 |
| 277               | 0.080                                               | 0.980            | 0.273              | 3.66321                                            | 3.66321                                       | 0.56386                                          | 7.07386 |
| 278               | 0.073                                               | 0.897            | 0.252              | 3.60335                                            | 3.60335                                       | 0.55671                                          | 7.06671 |
| 279               | 0.068                                               | 0.818            | 0.227              | 3.71698                                            | 3.71698                                       | 0.57019                                          | 7.08019 |
| 280               | 0.066                                               | 0.739            | 0.211              | 3.64138                                            | 3.64138                                       | 0.56127                                          | 7.07127 |
| 281               | 0.058                                               | 0.667            | 0.188              | 3.68462                                            | 3.68462                                       | 0.56639                                          | 7.07639 |
| 282               | 0.054                                               | 0.604            | 0.171              | 3.70085                                            | 3.70085                                       | 0.56830                                          | 7.07830 |
| 283               | 0.051                                               | 0.544            | 0.156              | 3.69524                                            | 3.69524                                       | 0.56764                                          | 7.07764 |
| 284               | 0.044                                               | 0.491            | 0.139              | 3.70526                                            | 3.70526                                       | 0.56882                                          | 7.07882 |
| 285               | 0.045                                               | 0.449            | 0.128              | 3.86747                                            | 3.86747                                       | 0.58743                                          | 7.09743 |
| 286               | 0.040                                               | 0.400            | 0.117              | 3.67532                                            | 3.67532                                       | 0.56530                                          | 7.07530 |
| 287               | 0.037                                               | 0.362            | 0.104              | 3.85075                                            | 3.85075                                       | 0.58554                                          | 7.09555 |
| 288               | 0.040                                               | 0.332            | 0.100              | 3.86667                                            | 3.86667                                       | 0.58734                                          | 7.09734 |
| 289               | 0.031                                               | 0.293            | 0.085              | 3.85185                                            | 3.85185                                       | 0.58567                                          | 7.09567 |
| 290               | 0.029                                               | 0.270            | 0.076              | 4.12766                                            | 4.12766                                       | 0.61570                                          | 7.12570 |

$$pK_a = 7.07$$

**Table S3.** Optimization of reaction conditions of *o*-phenylenediamine and chloroacetophenone <sup>a,b</sup>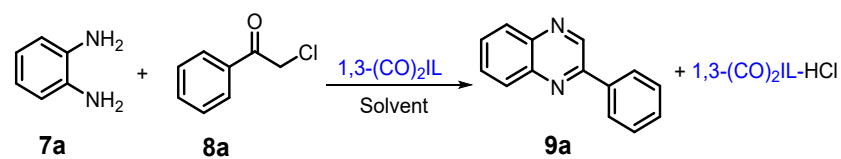

| Entry           | Solvent                          | Temperature (°C) | Yield (%) |
|-----------------|----------------------------------|------------------|-----------|
| 1               | -                                | 40               | 68        |
| 2               | C <sub>2</sub> H <sub>5</sub> OH | 40               | 59        |
| 3               | CH <sub>3</sub> CN               | 40               | 67        |
| 4               | Butyl acetate                    | 40               | 66        |
| 5               | 1,4-Dioxane                      | 40               | 45        |
| 6               | Toluene                          | 40               | 55        |
| 7               | Toluene                          | r.t.             | 43        |
| 8               | Toluene                          | 40               | 48        |
| 9 <sup>c</sup>  | Toluene                          | 60               | 44        |
| 10 <sup>d</sup> | Toluene                          | 40               | 92        |
| 11 <sup>d</sup> | Toluene                          | 60               | 90        |
| 12 <sup>e</sup> | Toluene                          | 40               | 83        |
| 13 <sup>f</sup> | Toluene                          | 40               | 91        |

<sup>a</sup>Reaction conditions: **7a** (0.3 mmol), **8a** (0.3 mmol), 1,3-(CO)<sub>2</sub>ILs (0.45 mmol), Solvent (1.0 mL), 40°C, 12 h; <sup>b</sup> Isolated yields; <sup>c</sup> 1,3-(CO)<sub>2</sub>ILs (0.3 mmol); <sup>d</sup> **7a** (0.6 mmol); <sup>e</sup> **7a** (0.45 mmol); <sup>f</sup>14 h.

**Table S4.** Optimization of reaction conditions of aminopyridine and chloroacetophenone <sup>a,b</sup>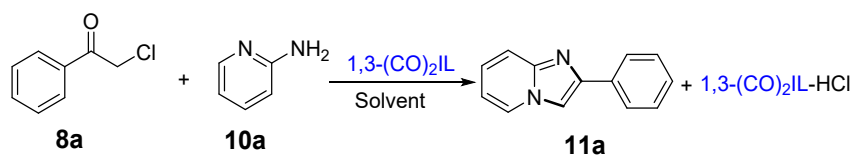

| Entry           | Solvent                            | 1,3-(CO) <sub>2</sub> IL (equiv.) | Temperature (°C) | Yield (%) |
|-----------------|------------------------------------|-----------------------------------|------------------|-----------|
| 1               | -                                  | 1.0                               | 40°C             | 45        |
| 2               | CH <sub>3</sub> OH                 | 1.0                               | 40°C             | 47        |
| 3               | CH <sub>3</sub> CH <sub>2</sub> OH | 1.0                               | 40°C             | 64        |
| 4               | Butyl acetate                      | 1.0                               | 40°C             | 49        |
| 5               | Anisole                            | 1.0                               | 40°C             | 63        |
| 6               | Toluene                            | 1.0                               | 40°C             | 56        |
| 7               | Anisole                            | 1.5                               | 60°C             | 71        |
| 8               | Anisole                            | 2.0                               | 60°C             | 70        |
| 9               | Anisole                            | 1.0                               | 60°C             | 61        |
| 10 <sup>c</sup> | Anisole                            | 1.0                               | 60°C             | 73        |
| 11 <sup>d</sup> | Anisole                            | 1.0                               | 60°C             | 83        |
| 12 <sup>e</sup> | Anisole                            | 1.0                               | 60°C             | 82        |

<sup>a</sup>Reaction conditions: **8a** (0.3 mmol), **10a** (0.3 mmol), solvent (1 mL), 10 h; <sup>b</sup>isolate yield; <sup>c</sup> **8a** (0.45 mmol); <sup>d</sup> **10a** (0.6 mmol); <sup>e</sup> 12 h.

#### 4 Characterization data

1-[1-(ethoxycarbonyl)-2-oxopropyl]-3-methylimidazolium inner salt:  $^1\text{H}$  NMR (400 MHz, DMSO- $d_6$ )  $\delta$  8.74 (s, 1H), 7.50 (s, 1H), 7.26 (s, 1H), 3.91 (d,  $J$  = 8.0 Hz, 2H), 3.82 (s, 3H), 2.19 (s, 3H), 1.08 (t,  $J$  = 7.1 Hz, 3H).  $^{13}\text{C}$  NMR (100 MHz, DMSO- $d_6$ )  $\delta$  181.88, 164.82, 139.67, 127.31, 121.56, 98.83, 57.40, 35.60, 27.51, 15.36. HRMS (ESI): Calculated for  $\text{C}_{10}\text{H}_{15}\text{O}_3\text{N}_2$ ,  $[\text{M}+\text{H}]^+$ : 211.1077; found :211.1075.

1-Carboxymethyl-3-methylimidazolium chloride:  $^1\text{H}$  NMR (400 MHz, DMSO)  $\delta$  9.39 (s, 1H), 7.82 (d,  $J$  = 9.7 Hz, 2H), 5.26 (s, 2H), 3.92 (s, 3H).  $^{13}\text{C}$  NMR (100 MHz, DMSO)  $\delta$  168.44, 138.13, 124.14, 123.60, 50.19, 36.34.

3-(triethylammonio) propane sulfonate:  $^1\text{H}$  NMR (400 MHz, MeOD)  $\delta$  3.50 – 3.41 (m, 2H), 3.34 (q,  $J$  = 7.3 Hz, 6H), 2.88 (t,  $J$  = 6.6 Hz, 2H), 2.13 (dq,  $J$  = 13.5, 6.9 Hz, 2H), 1.32 (t,  $J$  = 7.5 Hz, 9H).  $^{13}\text{C}$  NMR (100 MHz, MeOD)  $\delta$  55.30, 55.27, 55.24, 52.56, 52.53, 52.50, 47.46, 47.25, 47.21, 47.04, 17.70, 6.31.

1-chloro-3-phenoxypropan-2-ol :  $^1\text{H}$  NMR (400 MHz,  $\text{CDCl}_3$ )  $\delta$  7.29 (t,  $J$  = 7.9 Hz, 2H), 6.98 (t,  $J$  = 7.3 Hz, 1H), 6.91 (d,  $J$  = 8.1 Hz, 2H), 4.20 (p,  $J$  = 5.3 Hz, 1H), 4.11 – 4.02 (m, 2H), 3.73 (qd,  $J$  = 11.3, 5.4 Hz, 2H), 2.83 (s, 1H).  $^{13}\text{C}$  NMR (101 MHz,  $\text{CDCl}_3$ )  $\delta$  158.21, 129.62, 121.48, 114.58, 69.91, 68.43, 45.99.

1,3-Dichloro-2-propanol:  $^1\text{H}$  NMR (400 MHz,  $\text{CDCl}_3$ )  $\delta$  4.08 (p,  $J$  = 5.3 Hz, 1H), 3.70 (d,  $J$  = 5.3 Hz, 4H), 2.73 – 2.61 (m, 1H).  $^{13}\text{C}$  NMR (101 MHz,  $\text{CDCl}_3$ )  $\delta$  70.86, 45.77.

ethyl benzoate:  $^1\text{H}$  NMR (400 MHz,  $\text{CDCl}_3$ )  $\delta$  8.05 (d,  $J$  = 6.9 Hz, 2H), 7.59 – 7.50 (m, 1H), 7.44 (t,  $J$  = 7.7 Hz, 2H), 4.38 (q,  $J$  = 7.0 Hz, 2H), 1.40 (t,  $J$  = 7.1 Hz, 3H).  $^{13}\text{C}$  NMR (101 MHz,  $\text{CDCl}_3$ )  $\delta$  166.65, 132.80, 130.52, 129.54, 128.31, 60.96, 14.34.

2-Phenylquinoline:  $^1\text{H}$  NMR (400 MHz, DMSO- $d_6$ )  $\delta$  9.33 (s, 1H), 8.29 – 8.05 (m, 4H), 7.77 (p,  $J$  = 7.0 Hz, 2H), 7.56 (dt,  $J$  = 12.6, 6.9 Hz, 3H).  $^{13}\text{C}$  NMR (100 MHz, DMSO- $d_6$ )  $\delta$  147.14, 138.65, 137.58, 136.86, 132.06, 125.57, 125.47, 124.90, 124.82, 124.44, 124.40, 122.83.

2-Phenylimidazo[1,2-a]pyridine:  $^1\text{H}$  NMR (400 MHz,  $\text{CDCl}_3$ )  $\delta$  8.11 (d,  $J$  = 6.7 Hz, 1H), 8.01 – 7.92 (m, 2H), 7.86 (s, 1H), 7.64 (d,  $J$  = 9.1 Hz, 1H), 7.44 (t,  $J$  = 7.6 Hz, 2H), 7.33 (t,  $J$  = 7.4 Hz, 1H), 7.22 – 7.11 (m, 1H), 6.77 (t,  $J$  = 6.8 Hz, 1H).  $^{13}\text{C}$  NMR (100 MHz,  $\text{CDCl}_3$ )  $\delta$  145.75, 145.67, 133.76, 128.74, 127.98, 126.05, 125.61, 124.66, 117.50, 112.41, 108.16.

<sup>1</sup>H NMR and <sup>13</sup>C NMR of 1-Carboxymethyl-3-methylimidazolium chloride

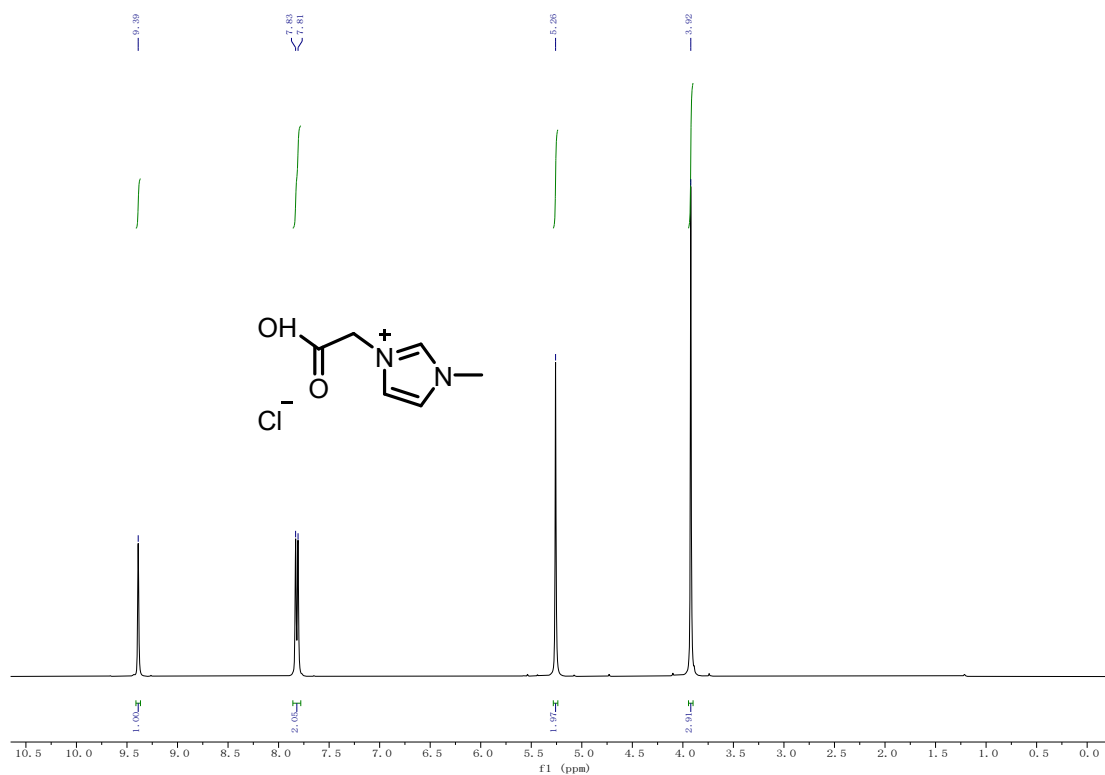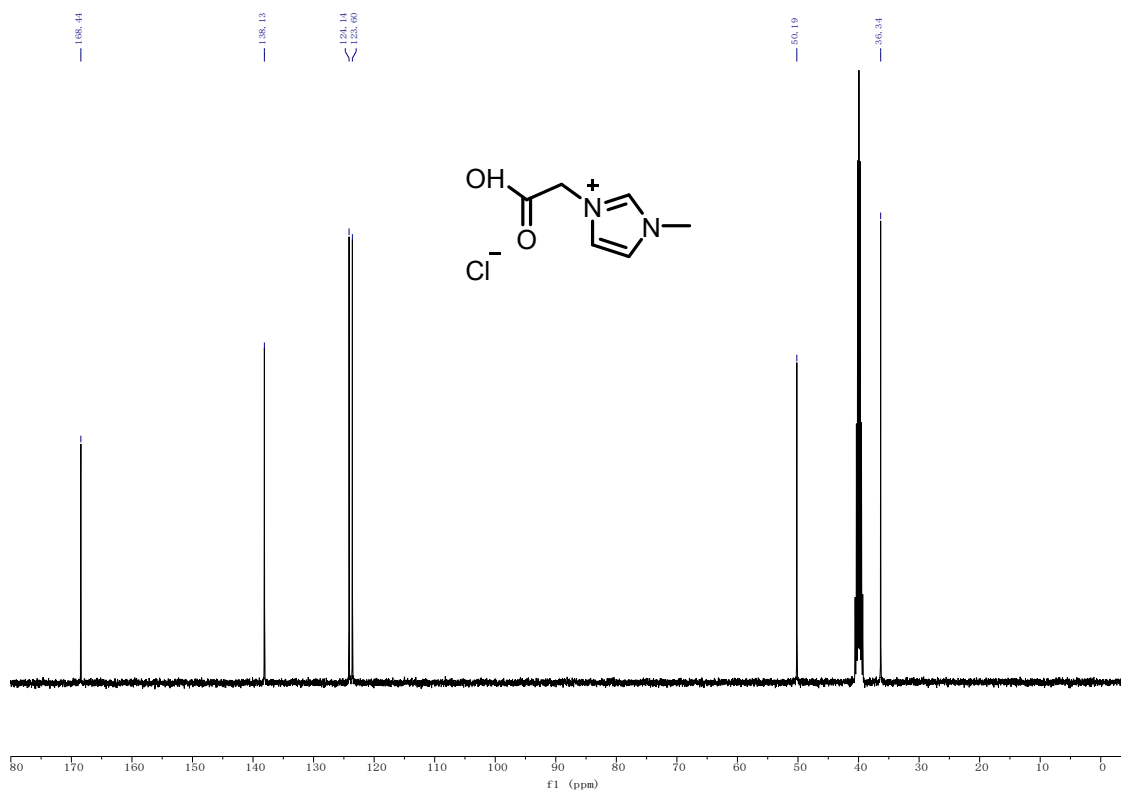

# $^1\text{H}$ NMR and $^{13}\text{C}$ NMR of 3-(triethylammonio) propane sulfonate

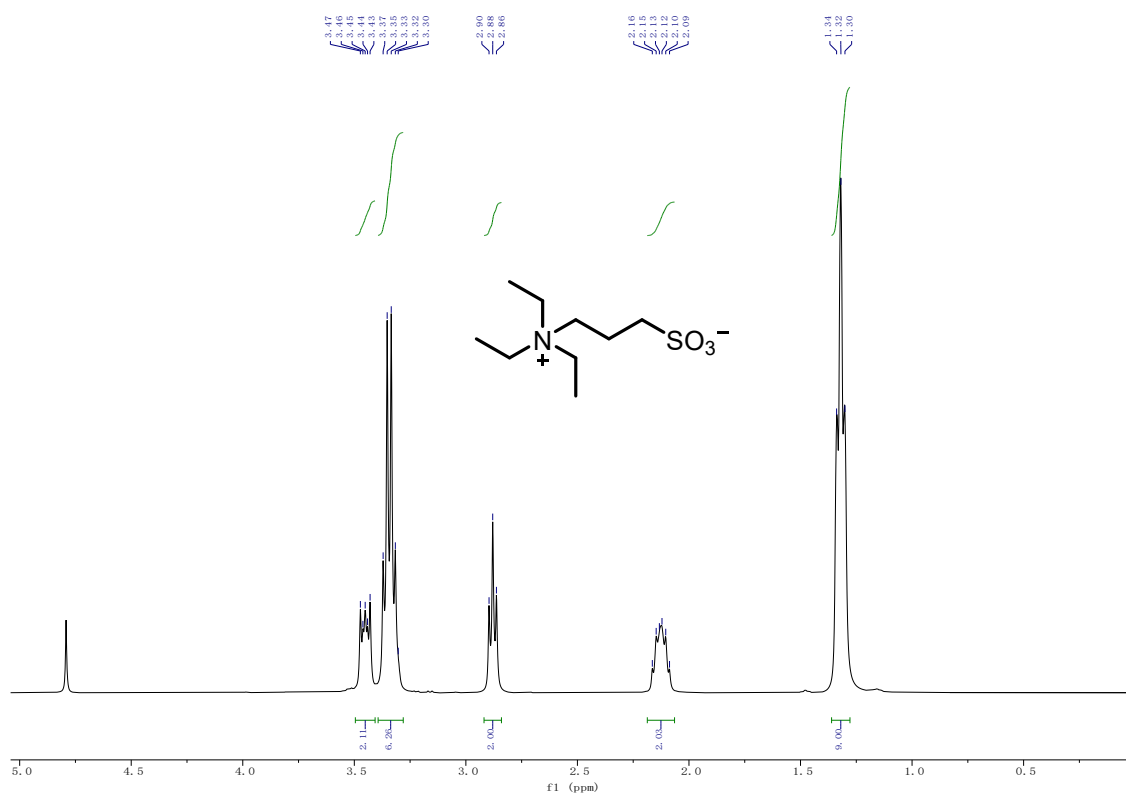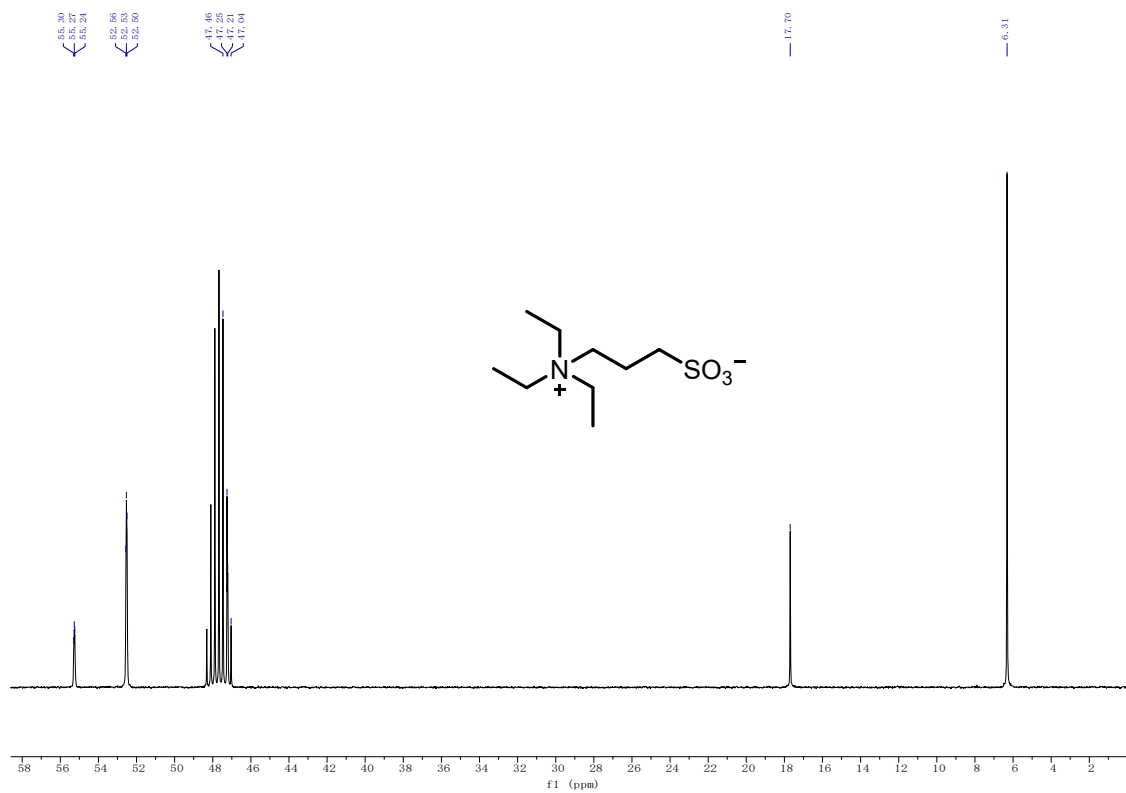



# $^1\text{H}$ NMR and $^{13}\text{C}$ NMR of 1-chloro-3-phenoxypropan-2-ol

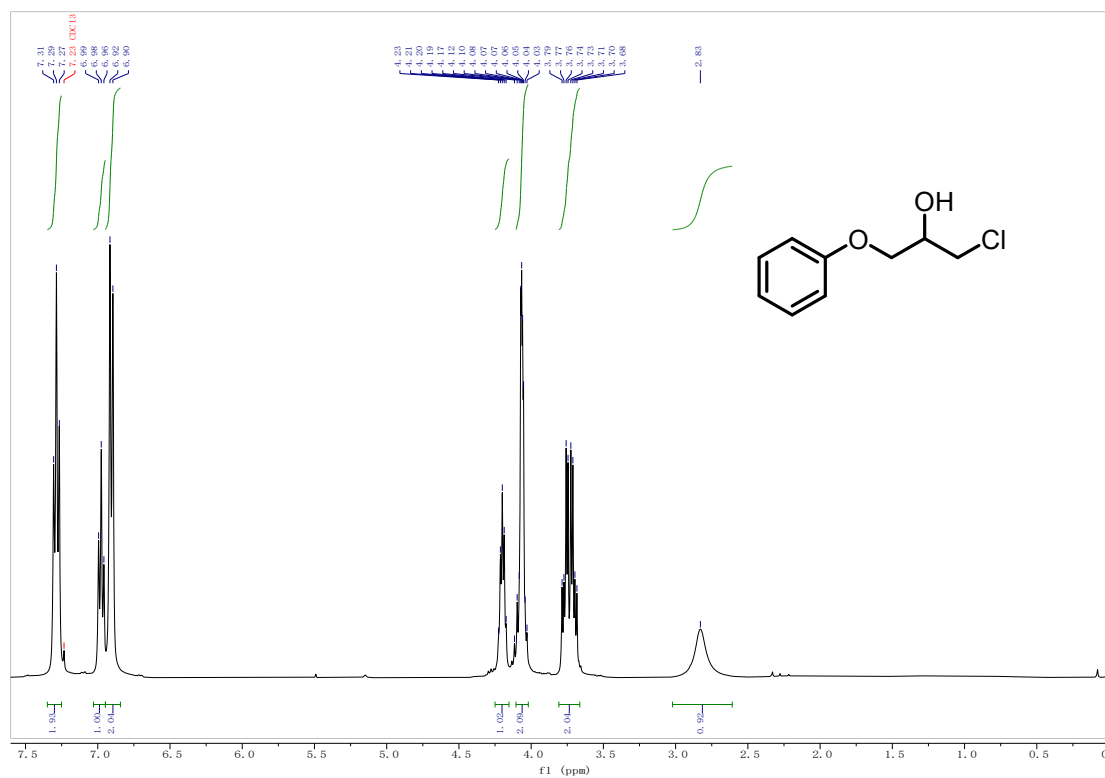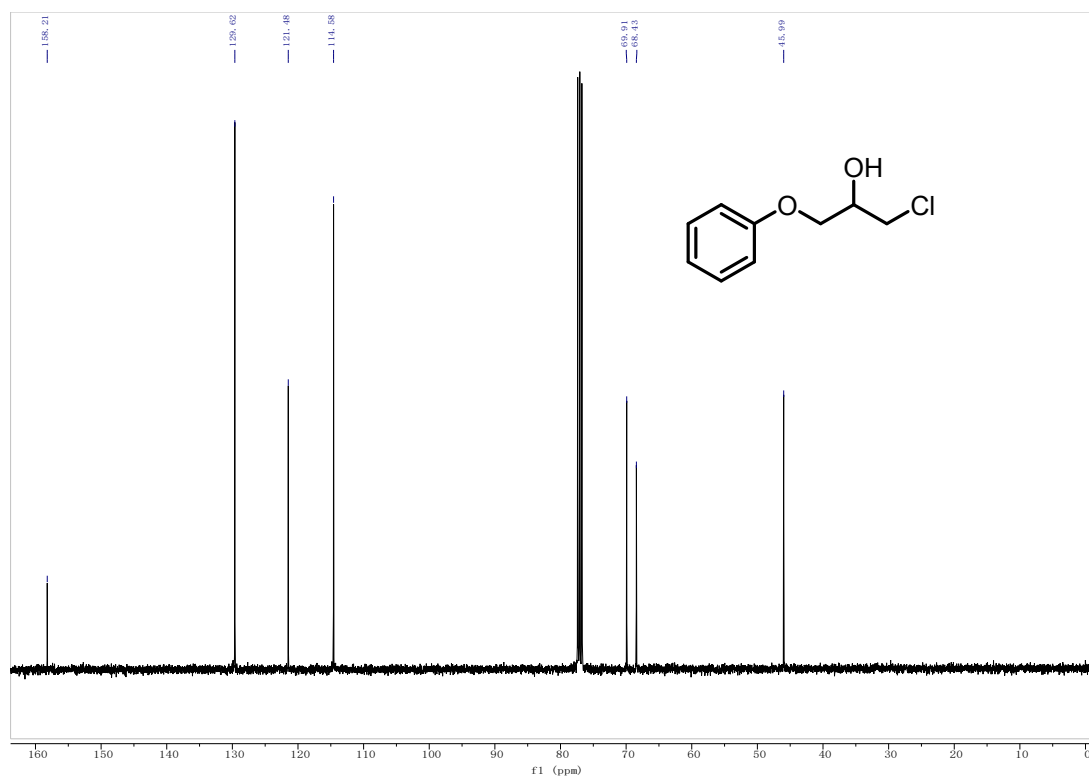

$^1\text{H}$  NMR and  $^{13}\text{C}$  NMR of 1,3-Dichloro-2-propanol:

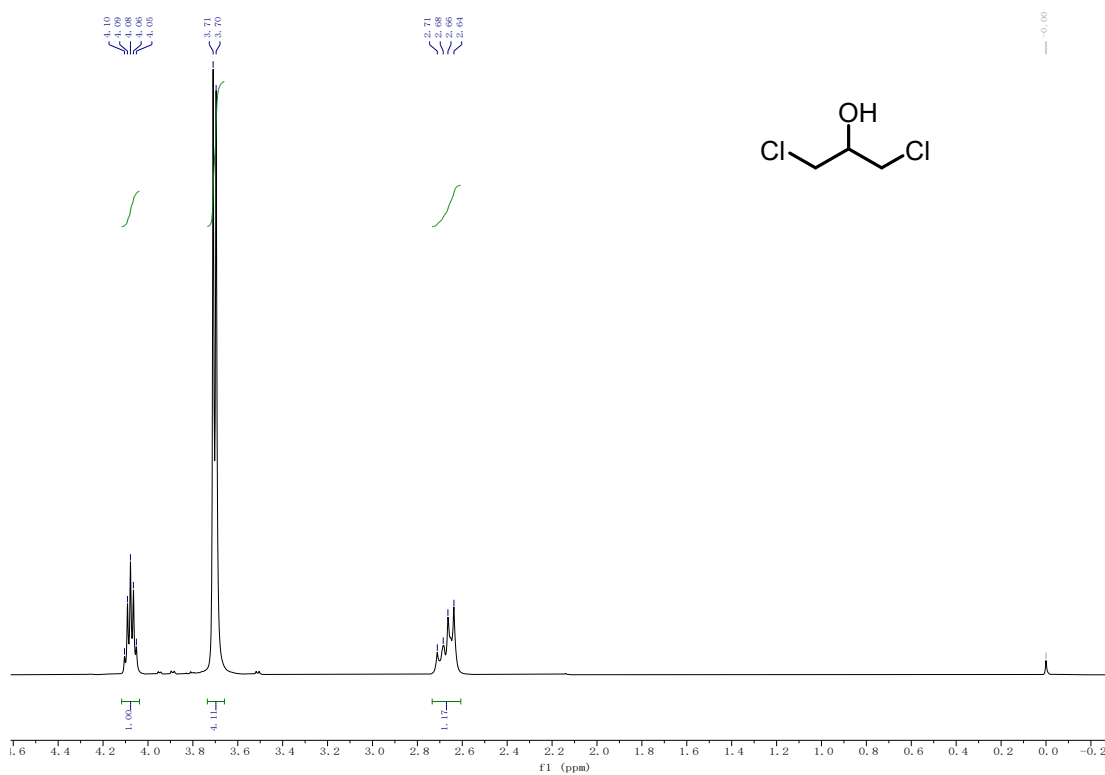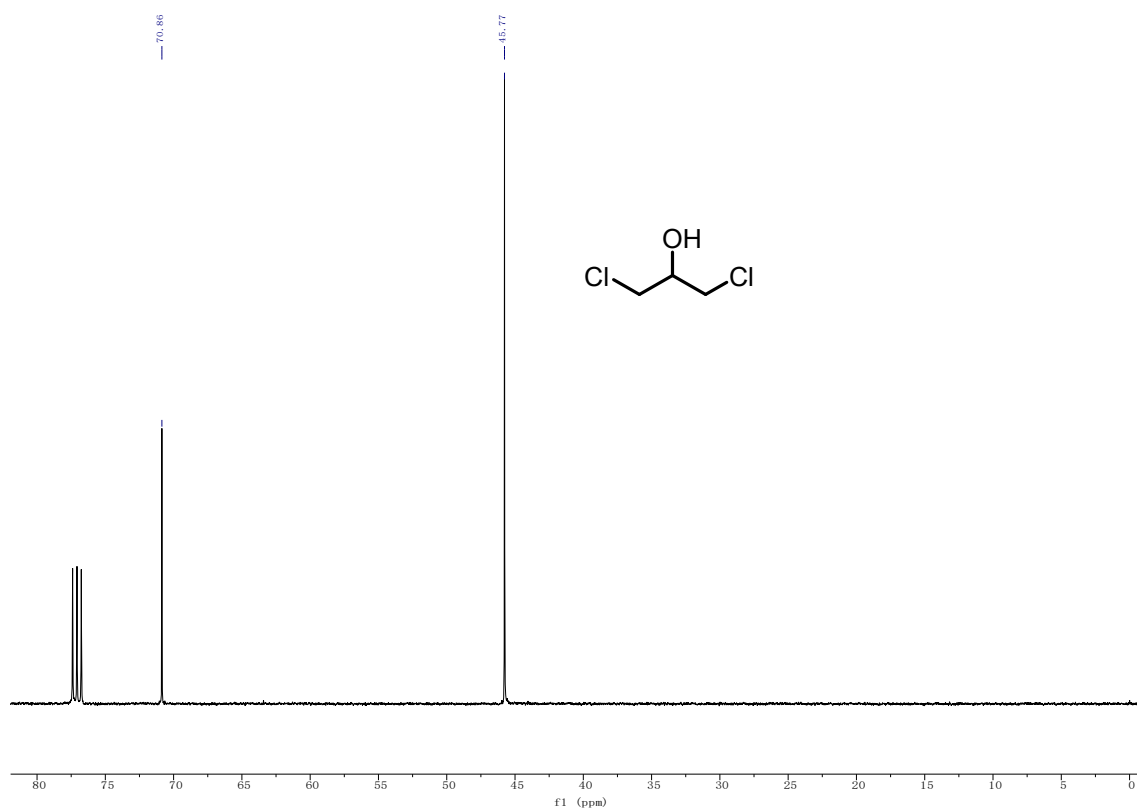

$^1\text{H}$  NMR and  $^{13}\text{C}$  NMR of ethyl benzoate:

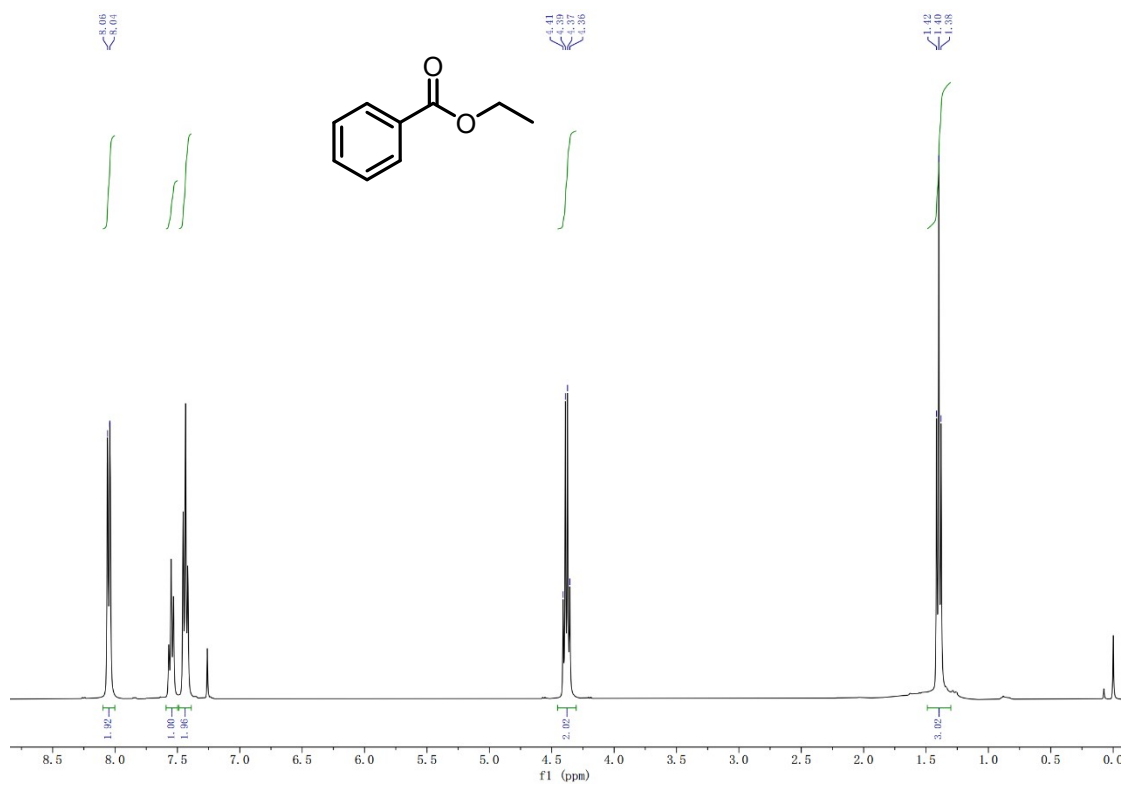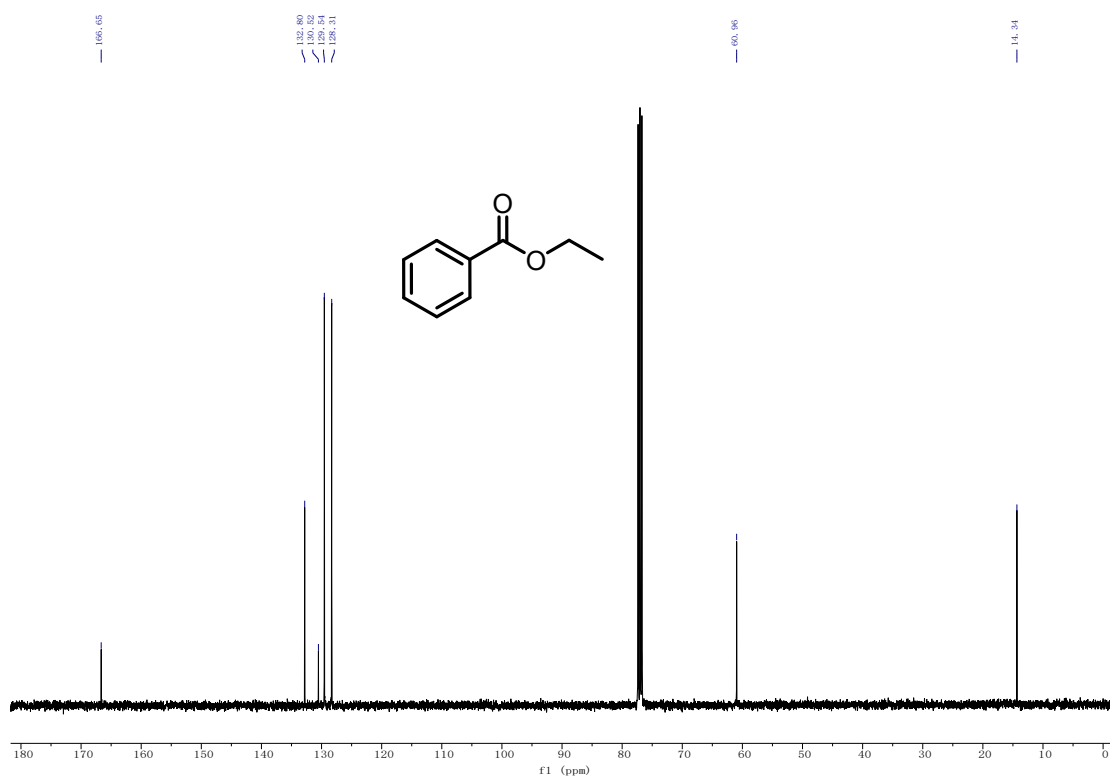

# $^1\text{H}$ NMR and $^{13}\text{C}$ NMR of 2-Phenylquinoline

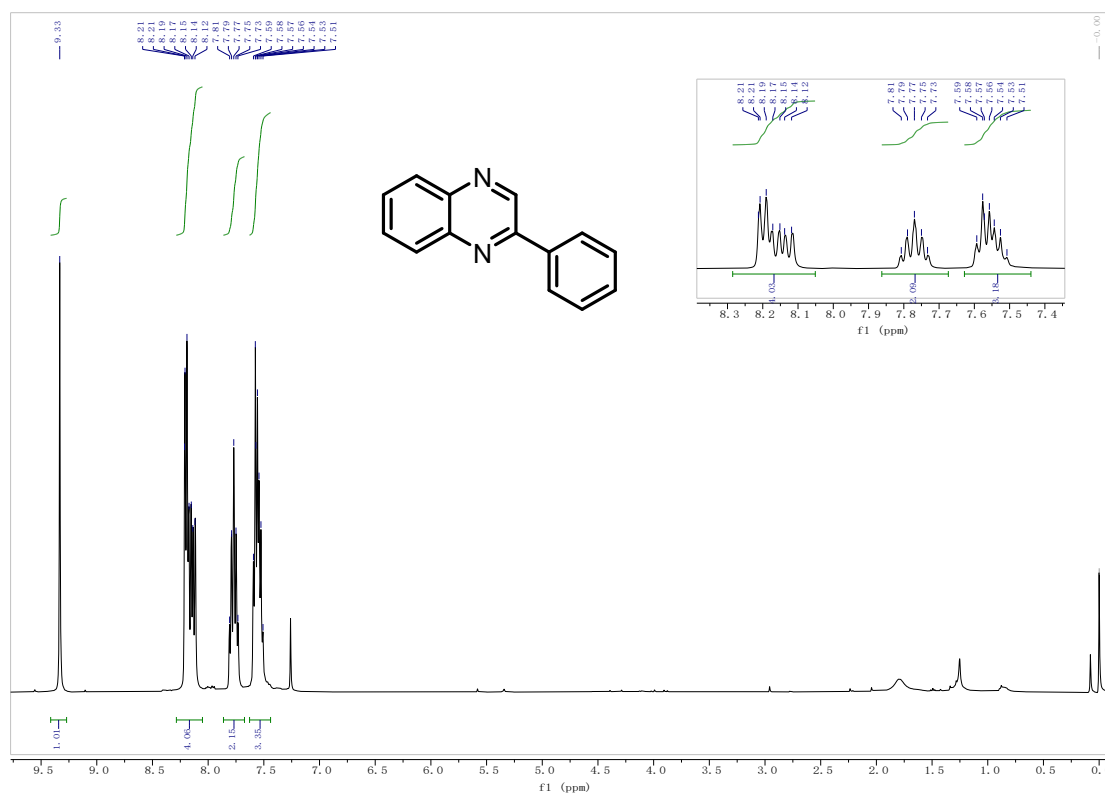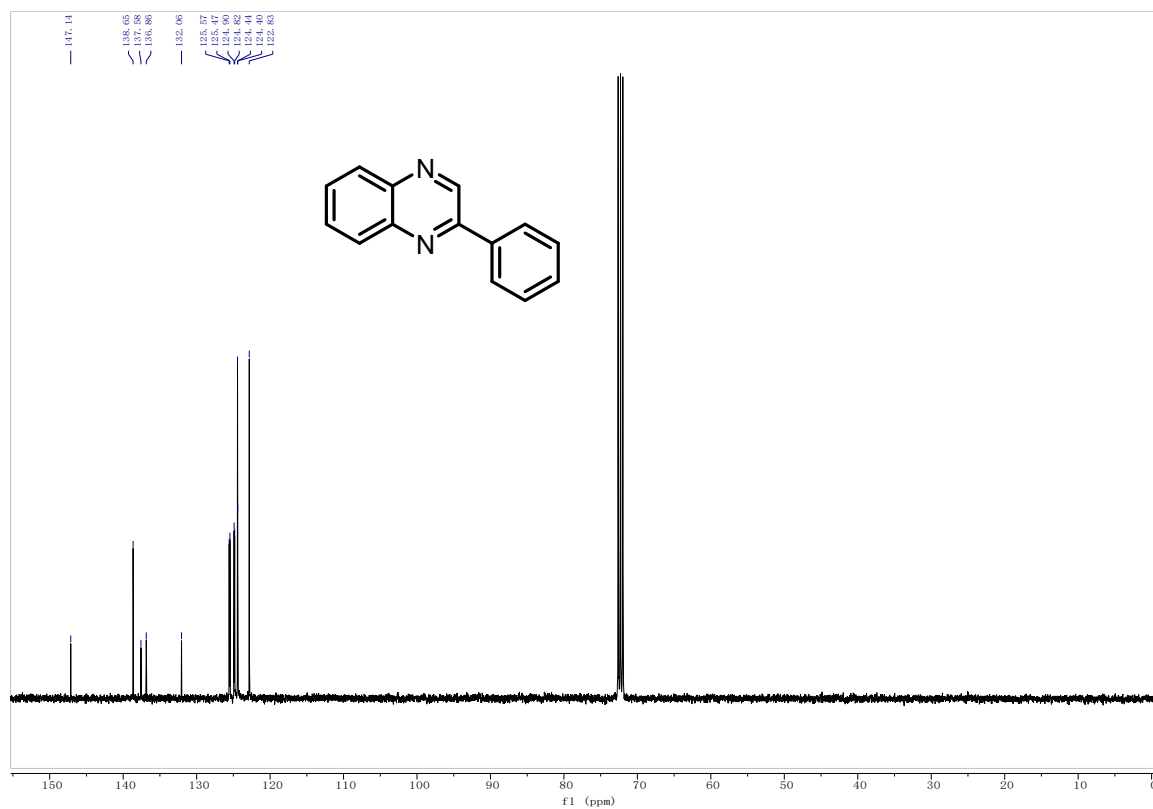

$^1\text{H}$  NMR and  $^{13}\text{C}$  NMR of 2-Phenylimidazo[1,2-a]pyridine:

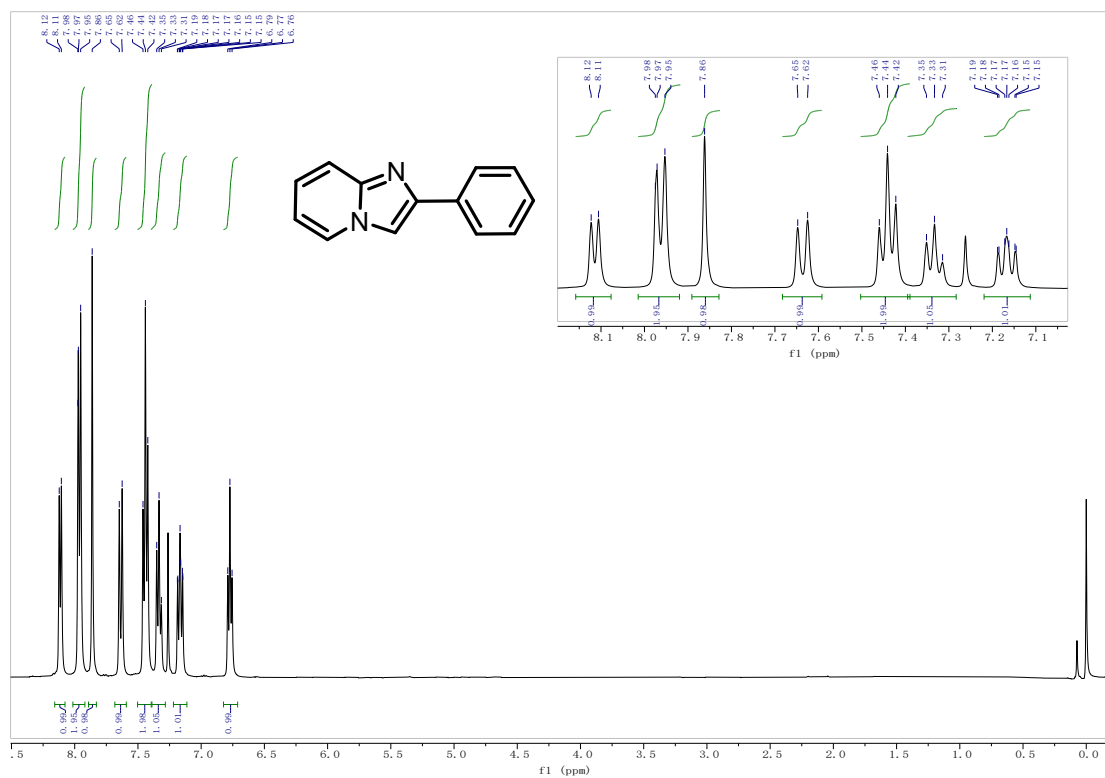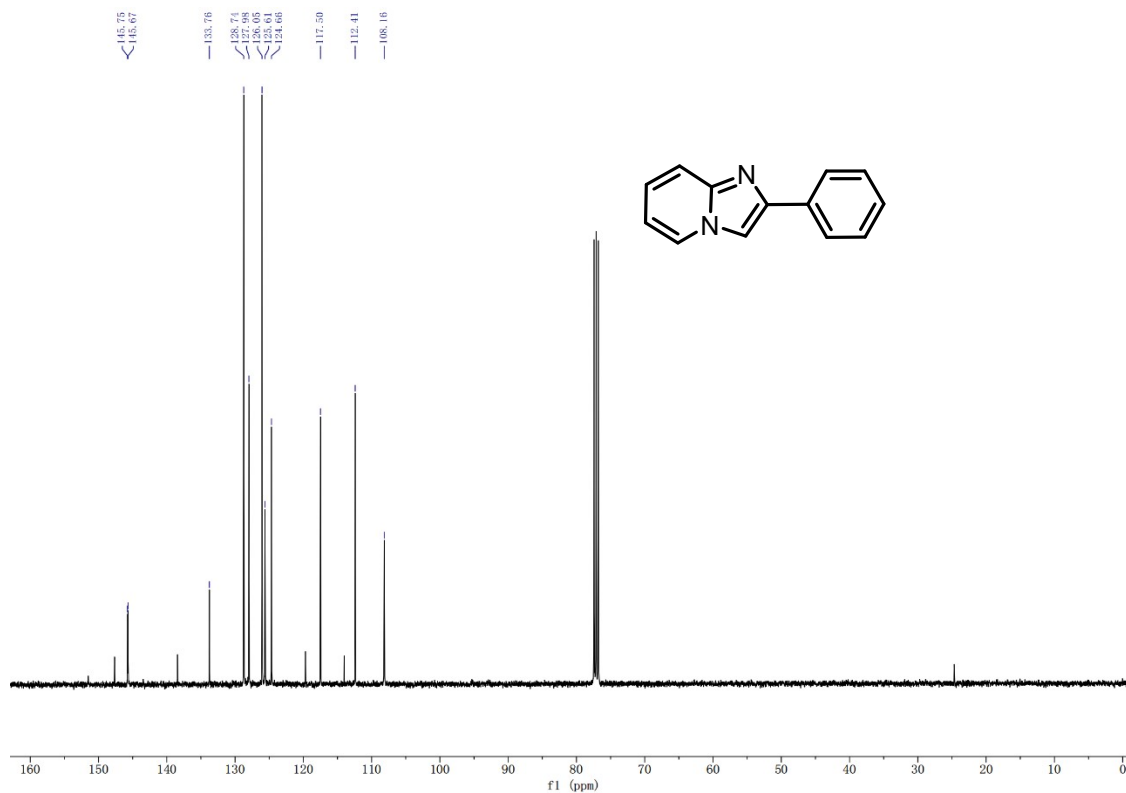

Supplement: d4gc00580e1.pdf [file d4gc00580e1.pdf]
